# Supplementary material
Source: Research Square preprint supplement (doi:10.21203/rs.3.rs-8977346/v1)
Supplement: Supplementary file 1 [file 0383a3b328cdd596daaab99a.docx]

| Confusion matrices | IH | | Sensitivity, % (95% CI) | Specificity, % (95% CI) | PPV, % (95% CI) | NPV, %  (95% CI) | Accuracy, % (95% CI) |
| --- | --- | --- | --- | --- | --- | --- | --- |
| Present | Absent |
| Anterior displacement of Bruch’s | | | 56 (31-78) | 100 (82-100) | 100 (69-100) | 70 (59-80) | 78 (62-90 |
| OCT+ | 10 | 0 |
| OCT- | 8 | 19 |
| Raised cup and rim | | | 83 (59-96) | 68 (43-87) | 71 (56-83) | 81 (60-93) | 76 (59-88) |
| OCT+ | 15 | 6 |
| OCT- | 3 | 13 |
| Cup obliteration | | | 17 (4-41) | 89 (67-99) | 60 (22-89) | 53 (47-59) | 54 (37-71) |
| OCT+ | 3 | 2 |
| OCT- | 15 | 17 |
| Severe atrophy | | | 6 (0-27) | 95 (74-100) | 50 (6-94) | 51 (48-55) | 51 (34-68) |
| OCT+ | 1 | 1 |
| OCT- | 17 | 18 |

**Supplemental Table 1: Confusion matrices for individual OCT signs using IH Definition 1**

*IH Definition 1: mean ICP ≥20mmHg and/or prolonged ICP spikes. Mean ICP ≥15mmHg and/or prolonged ICP spikes. Key: CI = confidence interval; excl. = excluding; IH = intracranial hypertension; NPV = negative predictive value; OCT = optical coherence tomography; OCT+ = positive OCT findings; OCT- = negative OCT findings; PPV = positive predictive value.*
