# Supplementary material
Source: Research Square preprint supplement (doi:10.21203/rs.3.rs-8977346/v1)
Supplement: Supplementary file 2 [file 1b36bb9b70a57c8b5dcef726.docx]

| ONH Parameter | Mean difference* | Lower 95% CI | Upper 95% CI | dF | Sig. (p-value) |
| --- | --- | --- | --- | --- | --- |
| **Primary OCT Measures** | | | | | |
| Disc width (μm) | 290 | 98 | 483 | 32.3 | **0.004** |
| Rim width (μm) | 471 | 232 | 709 | 33.9 | **<0.001** |
| Cup width (μm) | -84 | -286 | 117 | 33.6 | 0.402 |
| Nasal RNFL (μm) | 29 | 6 | 52 | 34.6 | **0.014** |
| Temp. RNFL (μm) | -5 | -18 | 8 | 34.1 | 0.436 |
| **Exploratory OCT measures** | | | | | |
| *Cup parameters* | | | | | |
| Cup-to-disc ratio | -0.083 | -0.19 | 0.03 | 34.1 | 0.129 |
| Nasal cup width (μm) | -36 | -121 | 48 | 34.1 | 0.39 |
| Temp. cup width (μm) | -48 | -175 | 78 | 33.5 | 0.443 |
| Cup depth (μm) | -46 | -160 | 69 | 32.8 | 0.422 |
| Cup area (μm2) | -48322 | -147335 | 50691 | 31.2 | 0.327 |
| Nasal cup area (μm2) | -10224 | -25728 | 5280 | 32.3 | 0.189 |
| Temp. cup area (μm2) | -11235 | -31105 | 8635 | 30.6 | 0.257 |
| *Rim parameters* | | | | | |
| Nasal rim width (μm) | 233 | 45 | 422 | 39.9 | **0.016** |
| Temp. rim width (μm) | 238 | 106 | 369 | 34.2 | **<0.001** |
| Nasal rim height (μm) | 151 | 32 | 270 | 33.7 | **0.015** |
| Temp. rim height (μm) | 179 | 81 | 277 | 34.0 | **<0.001** |
| Nasal rim edge (μm) | 145 | 63 | 228 | 33.5 | **0.001** |
| Temp. rim edge (μm) | 119 | 59 | 178 | 34.1 | **<0.001** |
| Rim area | 442109 | 188448 | 695770 | 33.8 | **0.001** |
| Nasal rim area | 259026 | 76246 | 441806 | 33.7 | **0.007** |
| Temp. rim area | 184107 | 79180 | 289033 | 34.0 | **0.001** |
| Nasal BMO-MRW (μm) | 146 | 63 | 229 | 33.5 | **0.001** |
| Temp. BMO-MRW (μm) | 125 | 64 | 187 | 34.1 | **<0.001** |
| *Retinal thickness* | | | | | |
| Nasal retinal thickness (μm) | 35 | 6 | 65 | 34.3 | **0.021** |
| Temp. retinal thickness (μm) | -10 | -32 | 13 | 33.5 | 0.38 |

**Supplemental Table 2: Mixed regression model comparing OCT measures and ICP using IH Definition 1.** *Positive values indicate that the OCT parameter was greater in raised ICP, while negative values indicate that the OCT parameter was lower in raised ICP. *Key: BMO-MRW = Bruch’s membrane opening minimum rim width; CI = confidence interval; df = degrees of freedom; ICP = intracranial pressure; IH = intracranial hypertension; MD = mean difference (intracranial hypertension minus intracranial normotension); ONH = optic nerve head; p-value = probability value; RNFL = retinal nerve fibre layer; sig. = significance (p-values <0.05 asterisked and highlighted in bold); temp. = temporal.*
